# Supplementary material for: Manipulation of connecting topology in carbazole/benzimidazole universal bipolar host materials for RGB and White PhOLEDs
Source: Royal Society of Chemistry journal article supplement (doi:10.1039/c3ra42067a), 2013-01-01
Supplement: c3ra42067a.pdf [file c3ra42067a.pdf]

## Manipulation of Connecting Topology in Carbazole/Benzimidazole Universal Bipolar Hosts for RGB and White PhOLEDs

Shu-Hua Chou,<sup>a</sup> Wen-Yi Hung,<sup>\*b</sup> Chih-Ming Chen,<sup>b</sup> Qu-Yuan Liu,<sup>b</sup> Yi-Hung Liu<sup>a</sup> and  
Ken-Tsung Wong<sup>\*a,c</sup>

<sup>a</sup> Department of Chemistry, National Taiwan University, Taipei 10617, Taiwan.

<sup>b</sup> Institute of Optoelectronic Sciences, National Taiwan Ocean University, Keelung 20224, Taiwan.

<sup>c</sup> Institute of Atomic and Molecular Sciences, Academia Sinica, Taipei, 10617, Taiwan.

### *Supporting Information*

#### Table of Contents

|                 |                                                                                                                                                                                                                |     |
|-----------------|----------------------------------------------------------------------------------------------------------------------------------------------------------------------------------------------------------------|-----|
| <b>Fig. S1</b>  | Atomic numbers of <i>o</i> -CPhBzIm and <i>m</i> -CPhBzIm in the geometry of S <sub>0</sub> optimized by B3LYP/6-31G(d).                                                                                       | S-2 |
| <b>Fig. S2</b>  | Crystal packing of <i>o</i> -CPhBzIm.                                                                                                                                                                          | S-2 |
| <b>Fig. S3</b>  | Cyclic voltammograms of <i>o</i> -CPhBzIm and <i>m</i> -CPhBzIm.                                                                                                                                               | S-3 |
| <b>Table S1</b> | Bond lengths ( <i>r</i> ) and dihedral angles ( $\Phi$ ) for DFT//B3LYP/6-31G(d) ground states (S <sub>0</sub> ) and CIS/6-31G(d) excited states (S <sub>1</sub> ) of <i>o</i> -CPhBzIm and <i>m</i> -CPhBzIm. | S-4 |
| <b>Table S2</b> | The crystal data of <i>o</i> -CPhBzIm.                                                                                                                                                                         | S-5 |

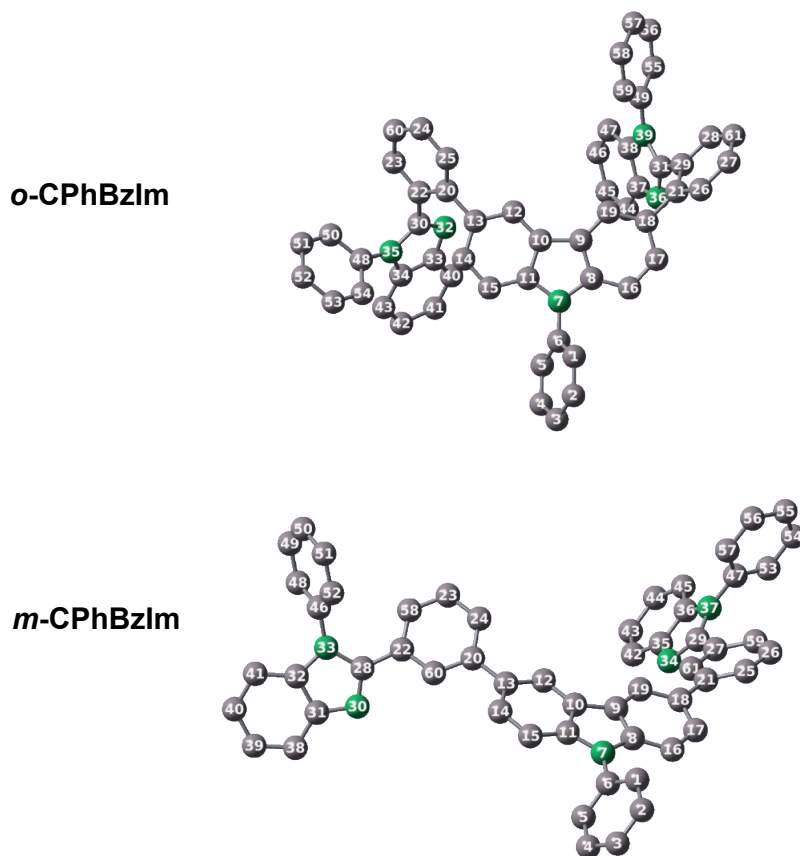

**Fig. S1** Atomic numbers of *o*-CPhBzIm and *m*-CPhBzIm in the geometry of  $S_0$  optimized by B3LYP/6-31G(d). All the protons are excluded.

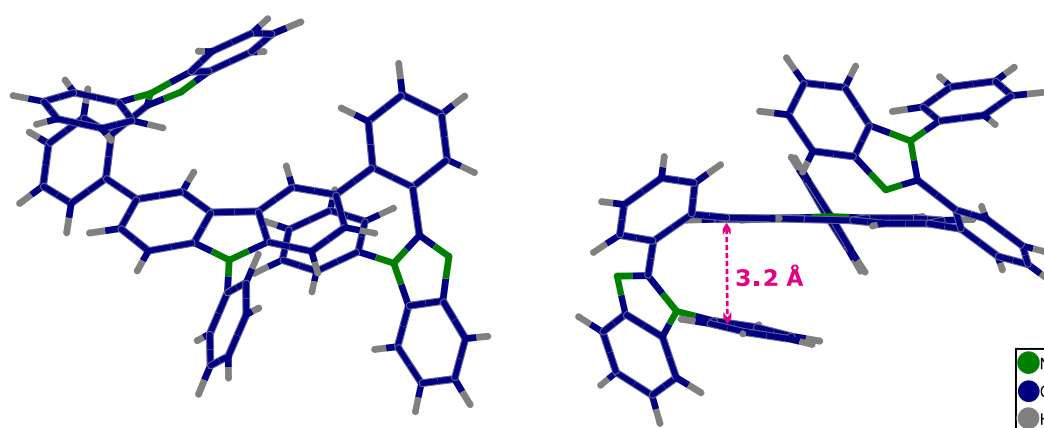

**Fig. S2** Crystal structure of *o*-CPhBzIm. The solvent molecules are omitted for clarity. The crystal was obtained by the slow evaporation from the hexane/chloroform co-solvent system.

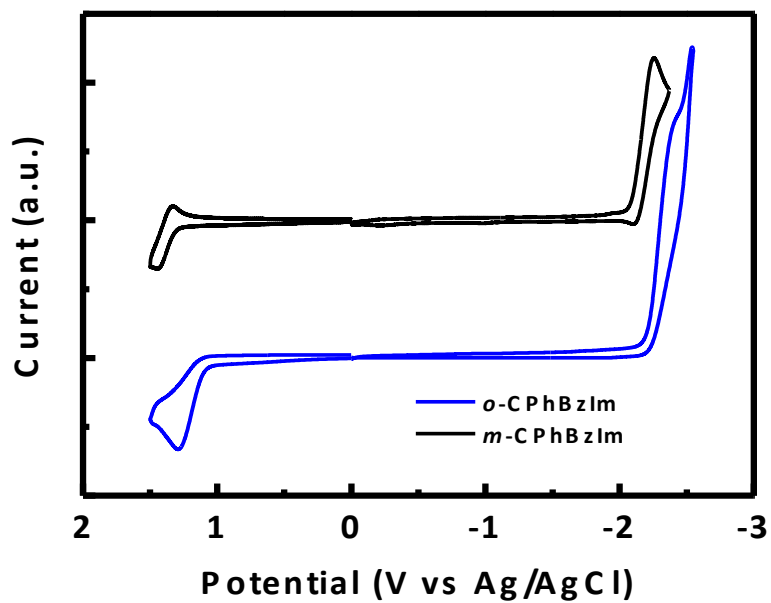

**Fig. S3** Cyclic voltammograms of *o*-CPhBzIm and *m*-CPhBzIm; 0.1 M TBAP (reduction) in DMF and 0.1 M TBAPF<sub>6</sub> (oxidation) in CH<sub>2</sub>Cl<sub>2</sub> were used as supporting electrolytes.

**Table S1** Bond lengths ( $r$ ) and dihedral angles ( $\Phi$ ) for DFT//B3LYP/6-31G(d) ground states ( $S_0$ ) and CIS/6-31G(d) excited states ( $S_1$ ) of *o*-CPhBzIm and *m*-CPhBzIm.

| <i>o</i> -CPhBzIm   | B3LYP/6-31G(d) $S_0$ | CIS/6-31G(d) $S_1$ | <i>m</i> -CPhBzIm | B3LYP/6-31G(d) $S_0$ | CIS/6-31G(d) $S_1$ |
|---------------------|----------------------|--------------------|-------------------|----------------------|--------------------|
| $r(7,11)$           | 1.39862              | 1.39178            | $r(7,11)$         | 1.39885              | 1.38692            |
| $r(11,10)$          | 1.4171               | 1.41642            | $r(11,10)$        | 1.41713              | 1.39817            |
| $r(10,12)$          | 1.39718              | 1.39134            | $r(10,12)$        | 1.39667              | 1.38942            |
| $r(12,13)$          | 1.3993               | 1.39357            | $r(12,13)$        | 1.40057              | 1.38604            |
| $r(13,20)$          | 1.48941              | 1.49179            | $r(13,20)$        | 1.48568              | 1.492              |
| $r(20,22)$          | 1.41425              | 1.41182            | $r(20,60)$        | 1.40109              | 1.37503            |
| $r(22,23)$          | 1.40225              | 1.39733            | $r(60,22)$        | 1.40383              | 1.44086            |
| $r(22,30)$          | 1.48697              | 1.47907            | $r(22,28)$        | 1.4739               | 1.40078            |
| $r(30,35)$          | 1.40413              | 1.38466            | $r(28,33)$        | 1.40078              | 1.41155            |
| $r(35,48)$          | 1.42917              | 1.42169            | $r(33,46)$        | 1.42823              | 1.42291            |
| $\Phi(11,7,6,1)$    | -124.68925           | -125.01504         | $A(11,7,6,1)$     | -124.92623           | -106.97394         |
| $\Phi(12,13,20,22)$ | 127.94239            | -53.89147          | $A(12,13,20,24)$  | -36.09328            | -44.96407          |
| $\Phi(19,18,21,29)$ | -53.89147            | -135.53848         | $A(19,18,21,25)$  | 142.70764            | 135.03988          |
| $\Phi(20,22,30,35)$ | 110.93178            | -60.69919          | $A(58,22,28,33)$  | -29.12682            | -4.82923           |
| $\Phi(21,29,31,39)$ | 135.20356            | 62.38141           | $A(59,27,29,37)$  | -30.49351            | -38.7755           |
| $\Phi(31,39,49,59)$ | -53.3322             | 55.35748           | $A(22,28,33,46)$  | -10.25591            | -20.90794          |
| $\Phi(30,35,48,54)$ | -111.52553           | -49.02867          | $A(27,29,37,47)$  | -10.50612            | -9.43388           |
| $\Phi(47,38,39,49)$ | 0.54649              | 6.08442            | $A(28,33,46,52)$  | -57.65537            | -60.47038          |
| $\Phi(43,34,35,48)$ | 8.83564              | -1.07163           | $A(29,37,47,57)$  | -56.79822            | -61.55644          |

**Table S2** The crystal data of *o*-CPhBzIm.

| <i>o</i> -CPhBzIm                    |                                                                                                                                                                   |
|--------------------------------------|-------------------------------------------------------------------------------------------------------------------------------------------------------------------|
| Empirical formula                    | C <sub>56</sub> H <sub>37</sub> N <sub>5</sub>                                                                                                                    |
| Formula weight                       | 949.16                                                                                                                                                            |
| Temperature                          | 150(2) K                                                                                                                                                          |
| Wavelength                           | 1.54178 Å                                                                                                                                                         |
| Crystal system                       | Monoclinic                                                                                                                                                        |
| Space group                          | P2 <sub>1</sub> /n                                                                                                                                                |
| Unit cell dimensions                 | $a = 14.0188(2) \text{ \AA}$ $\alpha = 90^\circ$<br>$b = 14.5960(2) \text{ \AA}$ $\beta = 106.5080(10)^\circ$<br>$c = 20.5850(3) \text{ \AA}$ $\gamma = 90^\circ$ |
| Cell Volume, <i>z</i>                | 4038.45(10) Å <sup>3</sup> , 4                                                                                                                                    |
| Density (calc.)                      | 1.283 Mg/m <sup>3</sup>                                                                                                                                           |
| <i>F</i> (000)                       | 1632                                                                                                                                                              |
| Reflections collected                | 16583                                                                                                                                                             |
| Independent reflections              | 7355 ( $R_{\text{int}} = 0.0354$ )                                                                                                                                |
| Final R indices [ $I > 2\sigma(I)$ ] | $R1 = 0.0471$ , $wR2 = 0.1188$                                                                                                                                    |
| R indices (all data)                 | $R1 = 0.0782$ , $wR2 = 0.1336$                                                                                                                                    |
